# Supplementary material
Source: PubMed Central journal article supplement (PMC4856566)
Supplement: NIHMS765454-supplement-Supplemental_Material.pdf [file NIHMS765454-supplement-Supplemental_Material.pdf]

## SUPPLEMENTAL MATERIAL

**Supplemental Table 1.** Proportion of patients enrolled by US sites by age by time period.

|                 | <b>Randomization year</b> |                  |                  |                  |
|-----------------|---------------------------|------------------|------------------|------------------|
|                 | <b>1994–1997</b>          | <b>1998–2001</b> | <b>2002–2005</b> | <b>2006–2010</b> |
| Overall         | 29.1% (26378)             | 18.9% (13603)    | 54.7% (11174)    | 18.8% (24986)    |
| Age <65 years   | 31.0% (13401)             | 20.7% (6377)     | 55.9% (4320)     | 21.1% (11774)    |
| Age 65–74 years | 26.5% (8710)              | 16.5% (4353)     | 51.8% (4014)     | 16.9% (8170)     |
| Age 75–79 years | 28.5% (2543)              | 16.4% (1769)     | 53.7% (1611)     | 15.9% (2911)     |
| Age 80–84 years | 27.9% (1277)              | 22.9% (778)      | 58.9% (888)      | 15.7% (1603)     |
| Age ≥85 years   | 33.6% (447)               | 19.6% (326)      | 67.2% (341)      | 24.2% (528)      |

Percentage and denominator is reported.

**Supplemental Table 2.** Death or myocardial infarction by age by time period.

|                         | <b>Randomization Year</b> |                  |                  |                  |
|-------------------------|---------------------------|------------------|------------------|------------------|
|                         | <b>1994–1997</b>          | <b>1998–2001</b> | <b>2002–2005</b> | <b>2006–2010</b> |
| <b>Age &lt;65 years</b> | <b>N=13401</b>            | <b>N=6377</b>    | <b>N=4320</b>    | <b>N=11774</b>   |
| 30-day death or MI      | 8.3%                      | 6.3%             | 11.8%            | 5.5%             |
| <b>Age 65–74 years</b>  | <b>N=8710</b>             | <b>N=4353</b>    | <b>N=4014</b>    | <b>N=8170</b>    |
| 30-day death or MI      | 12.8%                     | 10.7%            | 14.8%            | 6.8%             |
| <b>Age 75–79 years</b>  | <b>N=2543</b>             | <b>N=1769</b>    | <b>N=1611</b>    | <b>N=2911</b>    |
| 30-day death or MI      | 16.2%                     | 13.3%            | 16.1%            | 9.0%             |
| <b>Age 80–84 years</b>  | <b>N=1277</b>             | <b>N=778</b>     | <b>N=888</b>     | <b>N=1603</b>    |
| 30-day death or MI      | 19.6%                     | 16.5%            | 18.1%            | 9.0%             |
| <b>Age ≥85 years</b>    | <b>N=447</b>              | <b>N=326</b>     | <b>N=341</b>     | <b>N=528</b>     |
| 30-day death or MI      | 19.9%                     | 18.1%            | 20.5%            | 11.7%            |

MI: myocardial infarction.

**Supplemental Table 3.** Bleeding rates and use of transfusion by age according to randomization year.

|                         | <b>Randomization Year</b> |                  |                  |                  |
|-------------------------|---------------------------|------------------|------------------|------------------|
|                         | <b>1994–1997</b>          | <b>1998–2001</b> | <b>2002–2005</b> | <b>2006–2010</b> |
| <b>Age &lt;65 years</b> | <b>(N=13401)</b>          | <b>(N=6377)</b>  | <b>(N=4320)</b>  | <b>(N=11774)</b> |
| Mild bleeding           | 18.7% (13393)             | 18.4% (2924)     | 27.2% (4305)     | 10.2% (11691)    |
| Moderate bleeding       | 5.5% (13393)              | 10.9% (2924)     | 9.4% (4305)      | 2.1% (11691)     |
| Severe bleeding         | 0.8% (13393)              | 1.0% (2924)      | 1.3% (4305)      | 0.7% (11691)     |
| Transfusion             | 5.4% (13394)              | 7.8% (2924)      | 12.7% (4320)     | 5.2% (11759)     |
| <b>Age 65–74 years</b>  | <b>(N=8710)</b>           | <b>(N=4353)</b>  | <b>(N=4014)</b>  | <b>(N=8170)</b>  |
| Mild bleeding           | 22.7% (8705)              | 24.5% (1776)     | 30.6% (4000)     | 14.0% (8101)     |
| Moderate bleeding       | 10.1% (8706)              | 17.7% (1776)     | 13.0% (4000)     | 4.0% (8101)      |
| Severe bleeding         | 1.6% (8705)               | 1.9% (1776)      | 2.7% (4000)      | 1.2% (8100)      |
| Transfusion             | 10.4% (8706)              | 14.1% (1776)     | 16.8% (4014)     | 7.9% (8161)      |
| <b>Age 75–79 years</b>  | <b>(N=2543)</b>           | <b>(N=1769)</b>  | <b>(N=1611)</b>  | <b>(N=2911)</b>  |
| Mild bleeding           | 25.0% (2542)              | 32.6% (657)      | 31.1% (1604)     | 16.7% (2868)     |
| Moderate bleeding       | 12.5% (2542)              | 19.5% (657)      | 16.0% (1604)     | 5.3% (2868)      |
| Severe bleeding         | 2.0% (2542)               | 1.7% (657)       | 2.9% (1604)      | 1.9% (2868)      |
| Transfusion             | 12.8% (2543)              | 16.0% (657)      | 20.4% (1611)     | 9.4% (2904)      |
| <b>Age 80–84 years</b>  | <b>(N=1277)</b>           | <b>(N=778)</b>   | <b>(N=888)</b>   | <b>(N=1603)</b>  |
| Mild bleeding           | 24.8% (1276)              | 27.6% (326)      | 32.0% (885)      | 18.0% (1575)     |
| Moderate bleeding       | 10.7% (1276)              | 18.7% (326)      | 16.8% (885)      | 5.7% (1575)      |
| Severe bleeding         | 2.0% (1276)               | 2.8% (326)       | 3.8% (885)       | 1.3% (1575)      |
| Transfusion             | 11.7% (1277)              | 17.8% (326)      | 21.6% (888)      | 10.7% (1595)     |
| <b>Age ≥85 years</b>    | <b>(N=447)</b>            | <b>(N=326)</b>   | <b>(N=341)</b>   | <b>(N=528)</b>   |
| Mild bleeding           | 24.2% (447)               | 24.2% (120)      | 29.0% (341)      | 18.3% (513)      |
| Moderate bleeding       | 10.5% (447)               | 19.2% (120)      | 15.0% (341)      | 6.2% (513)       |
| Severe bleeding         | 2.5% (447)                | 4.2% (120)       | 3.2% (341)       | 1.0% (513)       |
| Transfusion             | 12.1% (447)               | 16.7% (120)      | 20.2% (341)      | 14.6% (1431)     |

Percentage and denominator for each variable across time is reported. P-values for bleeding and transfusion rates by age over time: Mild bleeding, P=0.2341; Moderate bleeding, P=0.8660; Severe bleeding, P=0.4264; Transfusion, P<0.0001.

**Supplemental Table 4.** Bleeding and transfusion use by age for patients without CABG surgery during index hospitalization.

|                         | <b>Randomization Year</b> |                  |                  |                  |
|-------------------------|---------------------------|------------------|------------------|------------------|
|                         | <b>1994–1997</b>          | <b>1998–2001</b> | <b>2002–2005</b> | <b>2006–2010</b> |
| <b>Age &lt;65 years</b> | <b>(N=10801)</b>          | <b>(N=5450)</b>  | <b>(N=3443)</b>  | <b>(N=10297)</b> |
| Mild bleeding           | 16.3% (10795)             | 17.3% (2388)     | 23.5% (3435)     | 8.9% (10258)     |
| Moderate bleeding       | 1.7% (10795)              | 2.2% (2388)      | 1.7% (3435)      | 0.7% (10258)     |
| Severe bleeding         | 0.5% (10795)              | 0.3% (2388)      | 0.6% (3435)      | 0.3% (10258)     |
| Transfusion             | 1.5% (10798)              | 1.2% (2388)      | 2.4% (3443)      | 1.3% (10282)     |
| <b>Age 65–74 years</b>  | <b>(N=6501)</b>           | <b>(N=3563)</b>  | <b>(N=3170)</b>  | <b>(N=7063)</b>  |
| Mild bleeding           | 20.2% (6499)              | 23.9% (1350)     | 27.5% (3160)     | 12.9% (7029)     |
| Moderate bleeding       | 3.4% (6499)               | 5.7% (1350)      | 3.6% (3160)      | 1.7% (7029)      |
| Severe bleeding         | 0.9% (6499)               | 0.7% (1350)      | 1.5% (3160)      | 0.6% (7029)      |
| Transfusion             | 3.2% (6500)               | 3.2% (1350)      | 4.6% (3170)      | 2.7% (7059)      |
| <b>Age 75–79 years</b>  | <b>(N=1997)</b>           | <b>(N=1515)</b>  | <b>(N=1300)</b>  | <b>(N=2527)</b>  |
| Mild bleeding           | 23.2% (1997)              | 31.7% (530)      | 28.8% (1295)     | 15.1% (2498)     |
| Moderate bleeding       | 5.3% (1997)               | 9.2% (530)       | 6.2% (1295)      | 2.7% (2498)      |
| Severe bleeding         | 1.1% (1997)               | 0.6% (530)       | 1.8% (1295)      | 1.0% (2498)      |
| Transfusion             | 4.9% (1997)               | 6.0% (530)       | 8.2% (1300)      | 3.8% (2520)      |
| <b>Age 80–84 years</b>  | <b>(N=1117)</b>           | <b>(N=704)</b>   | <b>(N=740)</b>   | <b>(N=1444)</b>  |
| Mild bleeding           | 23.0% (1116)              | 28.2% (284)      | 29.5% (739)      | 16.9% (1425)     |
| Moderate bleeding       | 7.5% (1116)               | 11.3% (284)      | 8.4% (739)       | 3.4% (1425)      |
| Severe bleeding         | 1.6% (1116)               | 1.1% (284)       | 2.3% (739)       | 1.0% (1425)      |
| Transfusion             | 8.1% (1117)               | 10.6% (284)      | 11.8% (740)      | 5.7% (1436)      |
| <b>Age ≥85 years</b>    | <b>(N=418)</b>            | <b>(N=307)</b>   | <b>(N=305)</b>   | <b>(N=489)</b>   |
| Mild bleeding           | 23.4% (418)               | 22.9% (109)      | 27.9% (305)      | 18.8% (479)      |
| Moderate bleeding       | 8.1% (418)                | 12.8% (109)      | 9.8% (305)       | 4.6% (479)       |
| Severe bleeding         | 1.7% (418)                | 2.8% (109)       | 1.3% (305)       | 0.8% (479)       |
| Transfusion             | 8.9% (418)                | 11.0% (109)      | 13.8% (305)      | 9.9% (484)       |

Percentage and denominator for each variable across time is reported. CABG: coronary artery bypass grafting.

**Supplemental Figure 1.** Enrollment by region over time.

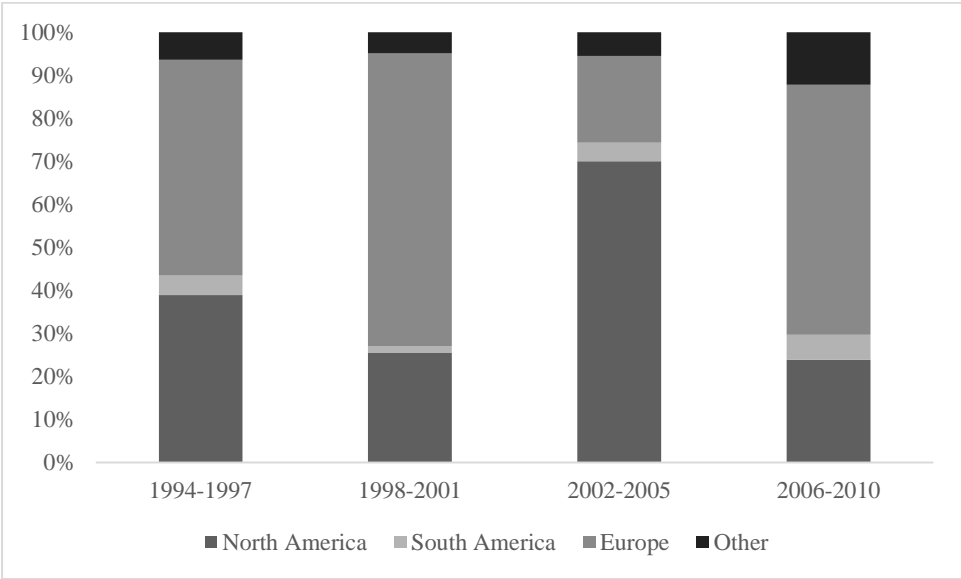

Other refers predominantly to Asia and Australia.

**Supplemental Figure 2.** In-hospital, 1-month, 6-month, and 1-year mortality by age over time.

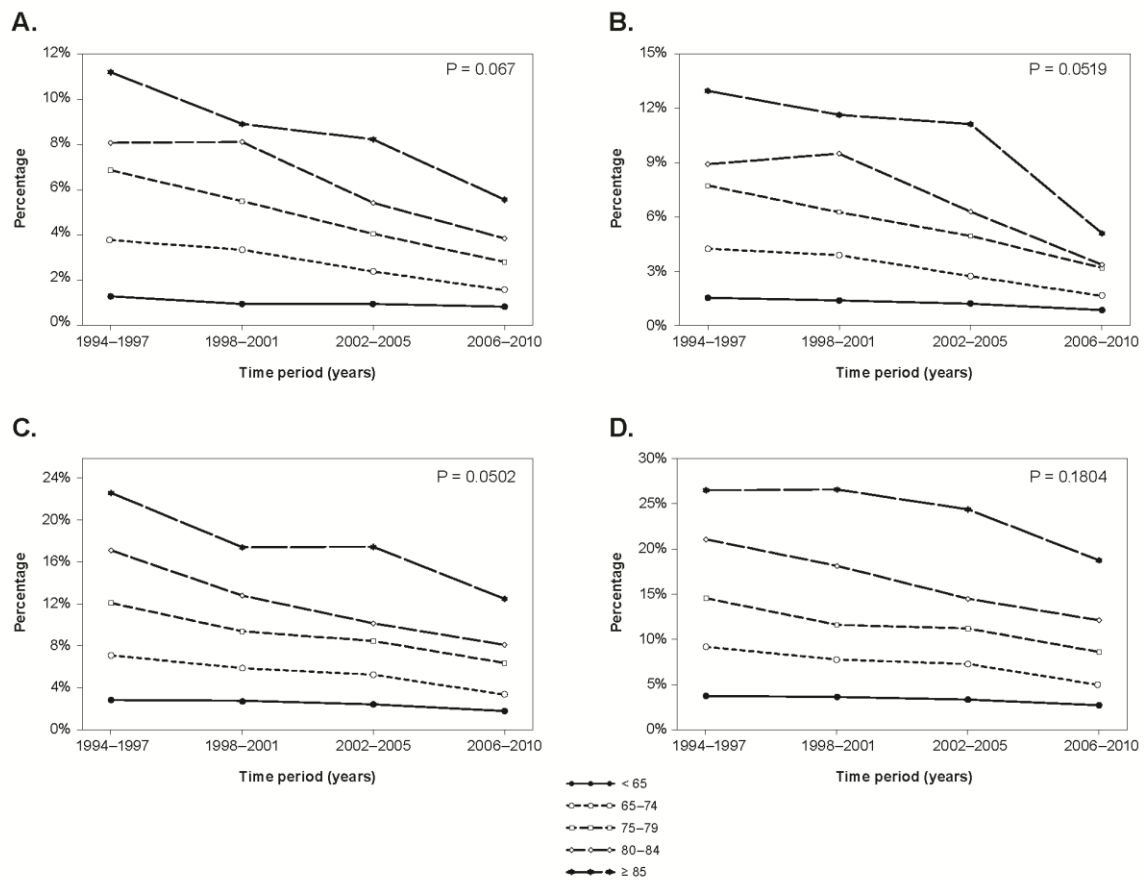

A) In-hospital mortality; B) 1-month mortality; C) 6-month Kaplan-Meier rates for mortality (6-month follow-up is not complete for GUSTO IV, EARLY ACS and PRISM trial participants); D) 1-year Kaplan-Meier rates for mortality (1-year follow-up is not complete for GUSTO IV, EARLY ACS, PRISM, and PRISM-PLUS trial participants). Insignificant P-values indicate similar pattern of change over time across all age groupings.
